# Supplementary material
Source: Elsevier journal article supplement (https://www.sciencedirect.com/science/article/pii/S2007078018300105)
Supplement: mmc1 [file S2007078018300105:mmc1.pdf]

## ANNEXED 1

**Por favor contesta honesta y claramente el siguiente cuestionario, sin dejar preguntas en blanco y teniendo en cuenta que se encuentra impreso a dos caras. Toda la información que proporciones será tratada de manera confidencial, anónima y con fines estadísticos. No existen respuestas correctas o incorrectas. De antemano agradecemos tu apoyo en esta investigación que ayudará a comprender mejor las relaciones de pareja actuales en México.**

**SEXO:** Hombre: \_\_\_\_\_ Mujer: \_\_\_\_\_ **EDAD:** \_\_\_\_\_ años \_\_\_\_\_ meses

Tipo de Universidad: 1. Pública ( ) 2. Privada ( )

Estatus actual de pareja (Por favor sólo marca una opción, en caso de que consideres que tu situación de pareja actual abarca dos o más opciones, selecciona la opción 13. Otro\* y después especifica en la línea de abajo):

1.Soltero( ) 2.Saliendo con alguien( ) 3.En una relación de noviazgo( ) 4.En una relación abierta [free]( ) 5.En una relación por internet( ) 6.Con más de una pareja al mismo tiempo( ) 7.Comprometido( ) 8.Casado( ) 9.En Unión libre( ) 10.Divorciado( ) 11.Separado( ) 12.Viudo( ) 13.Otro\*( )

\*Especifica: \_\_\_\_\_

Orientación sexual: 1. Heterosexual( ) 2. Homosexual( ) 3. Bisexual( ) 4. Asexual( ) 5.Transgénero 6.Otro\*( ) \*Especifica: \_\_\_\_\_

¿A qué edad tuviste tu primera relación de noviazgo? \_\_\_\_\_

¿Cuántas relaciones de pareja has tenido en tu vida?: \_\_\_\_\_ Ninguna ( )

De estas relaciones de pareja ¿Cuántas han sido importantes para ti?: \_\_\_\_\_ Ninguna ( )

De estas relaciones de pareja ¿Cuántas han sido sexualmente activas?: \_\_\_\_\_ Ninguna ( )

¿Cuántas relaciones abiertas o 'free' has tenido?: \_\_\_\_\_ Ninguna ( )

¿Cuántas veces has tenido relaciones sexuales de manera casual (por ejemplo: en una fiesta, con alguien que acababas de conocer y no volviste a ver, con alguien que conocías hacía poco tiempo y no era tu pareja)?: \_\_\_\_\_ Ninguna ( )

¿Asistes a lugares, antros o bares en los que se busca tener relaciones "one night stand" o de una sola noche?: 1.Nunca ( ) 2.Rara vez ( ) 3.Algunas veces ( ) 4.Frecuentemente ( ) 5.Siempre ( )

¿Alguna vez has atravesado por la ruptura de una relación de pareja? SI ( ) NO ( )

¿Cuánto tiempo ha pasado desde la última vez que experimentaste la ruptura de una relación de pareja? \_\_\_\_\_ años \_\_\_\_\_ meses \_\_\_\_\_ días

¿Cuánto tiempo duró esta relación de pareja? \_\_\_\_\_ años \_\_\_\_\_ meses

Lee las siguientes afirmaciones y marca con una X una sola opción (la que mejor describa tu situación):

*La RUPTURA de la relación con mi expareja....*

- ( ) No es importante para mí/ Es algo en lo que no pienso.
- ( ) Es buena para mí/ Es algo que me beneficia de alguna manera.
- ( ) Me ha ocasionado daños emocionales/ Me ha afectado de alguna manera.
- ( ) Me ha ocasionado daños emocionales, pero puedo hacer algo para evitar que siga sucediendo.

Marca con una cruz en la línea para indicar qué tan significativa o importante fue para ti esa pareja en tu vida:

0 \_\_\_\_\_ 10  
**Nada significativa** **La más significativa**

Marca con una cruz en la línea para indicar qué tan comprometido(a) te sentías con esta pareja durante su relación:

0 \_\_\_\_\_ 10  
**Nada comprometido** **Totalmente comprometido**

¿Quién decidió terminar con la relación de pareja?

**Yo** \_\_\_\_\_ **Él/Ella** \_\_\_\_\_ **Ambos** \_\_\_\_\_

**Otra persona (Indica de quién se trata)**

\_\_\_\_\_

Tu edad actual \_\_\_\_\_ años cumplidos Sexo (Hombre) (Mujer)

Edad actual de tu expareja \_\_\_\_\_ años cumplidos Sexo (Hombre) (Mujer)

¿Actualmente estás interesado en otra persona? SI ( ) NO ( )

**¡MUCHAS GRACIAS POR TU PARTICIPACIÓN!**
